# Supplementary material for: Light-Addressable Actuator-Sensor Platform for Monitoring and Manipulation of pH Gradients in Microfluidics: A Case Study with the Enzyme Penicillinase
Source: MDPI journal article supplement (doi:10.3390/bios11060171), 2021-05-27
Supplement: s1 [file s1]

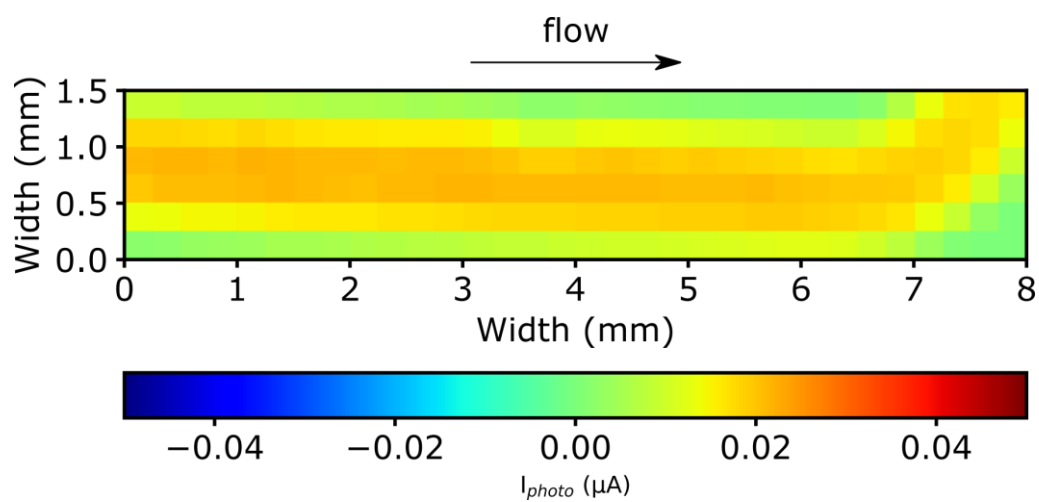

Figure S1: Reference chemical image of the microfluidic structure recorded at an applied potential of -1.65 V in 0.33 mM PBS buffer, pH 7.0.

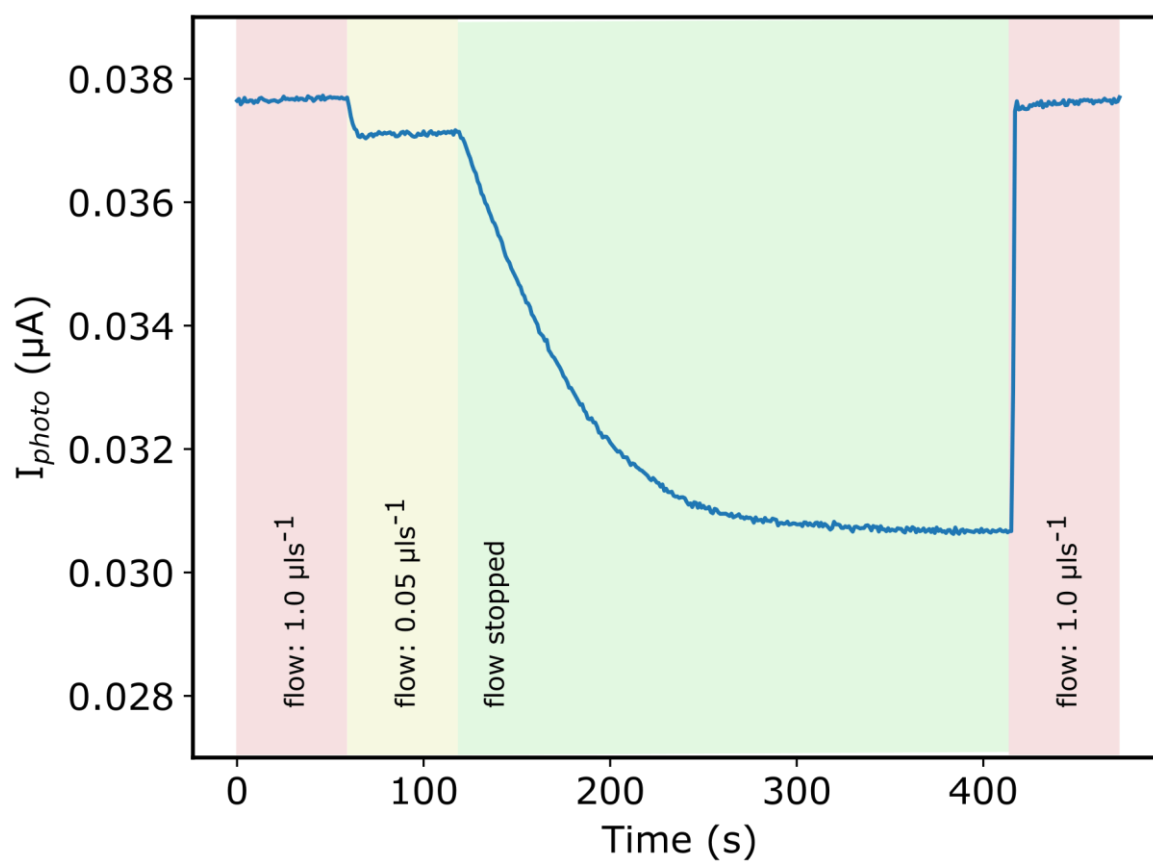

Figure S2: Photocurrent-time curve for 1.0 mM penicillin in PBS buffer, pH 7.1, for different flow rates.
